# Supplementary material
Source: publisher site journal article supplement (https://www.dovepress.com/get_supplementary_file.php?f=208826.docx)
Supplement: Supplementary file 1 [file get_supplementary_file.php]

| **Variable** | **Total population** (N=236) | **Athens**  (N1=49) | **Edinburgh**  (N2=45) | **Leuven**  (N3=54) | **London**  (N4=49) | **Groningen**  (N5=39) | **p value** |
| --- | --- | --- | --- | --- | --- | --- | --- |
| **Age (yrs)** | 67.4±8.4 | 66.2±8 | 71.7±7.4 | 66.3±6.5 | 68.7± 9.1 | 64±9.6 | <0.001 |
| **Male/**  **Female~** | 160:76 | 38:11 | 28:17 | 42:12 | 28:21 | 24:17 | 0.075 |
| **BMI (kg/m2)** | 27±5.5 | 27± 6.2 | 28.8±5.8 | 26.6±5.1 | 26.3±6 | 26.6±3.6 | 0.175 |
| **FEV1 %** | 57±20.5 | 46.9±15.3 | 61.6± 20.4 | 61.9± 22 | 53.6±23.2 | 62.3±15.6 | <0.001 |
| **RV/TLC%** | 50.9±11.4 | 51.8±12.8 | 48.9±9.3 | 51.9±13 | 53.1±9.8 | 47.3±10.3 | 0.130 |
| **6MWD (m)** | 449.8±127.2 | 356.3±99.2 | 403.9±124.8 | 500.5±135.6 | 412±128.4 | 472.3±91.7 | <0.001 |
| **QMVC (kg)** | 31.8±11.8 | 27.8±8.2 | 37.6±12.7 | 34.1±10 | 27.5±10.4 | 32.5±14.9 | <0.001 |
| **AG steps** | 3651 (3451) | 3437 (3225) | 2812 (2195) | 4803 (3750) | 3980 (3825) | 3784 (3450) | 0.020 |
| **AG mvpa** | 7.4 (16.5) | 7.5 (20.1) | 7.6 (8.7) | 9.8 (16) | 9.4 (24.5) | 6.8 (12.5) | 0.061 |
| **AG VMU** | 369667 (249064.7) | 307457.3 (210208.9) | 293525.3 (161741) | 442922 (244702) | 372926.9 (300737.8) | 408209.9 (239245.4) | 0.022 |
| **Temp (°C)** | 16.6 (7.3) | 20.5 (15.1) | 14.4 (4.8) | 17 (7.1) | 20.2 (7.5) | 12.4 (5.5) | <0.001 |
| **Sunshine (hrs)** | 4.9 (3.5) | 6.5 (3.8) | 2.8 (1.4) | - | 4.8 (3.1) | - | <0.001 |
| **Rainfall (hrs/day)** | 0.3 (1.2) | 0 (0) | 1. (1.6) | 0.5 (1.4) | 0.4 (1) | 0.1 (1) | <0.001 |
| **MM steps** | 4234 (3399) | 4029 (3360) | 3464 (2651) | 5424 (3428) | 3870 (4235) | 4782 (3779) | <0.001 |
| **MM walktime (mins)** | 55.7 (41.6) | 52.8 (41.5) | 42.9 (27.7) | 71.5 (37.1) | 48.3 (47) | 59.3 (39.5) | <0.001 |
| **MM intensity (g)** | 0.2 (0) | 0.2 (0) | 0.2 (0) | 0.2 (0) | 0.2 (0.1) | 0.2 (0) | 0.024 |
| **MM VMU** | 261886.6 (237020) | 222987.5 (229268) | 209729.5 (137074) | 344873 (239654) | 296360.5 (247505) | 332468.7 (193225) | 0.002 |
| **Daylength (mins)** | 633.8(166.3) | 646.5 (113.8) | 585.4 (173.7) | 653.5 (241.8) | 708.2 (211) | 567.1 (82.6) | <0.001 |
| **HAD A$** | 5 (7) | 6 (7) | 6 (5.5) | 4 (6.5) | 6 (7.5) | 3 (4) | 0.004 |
| **HAD D$** | 4(5) | 5 (4.5) | 5 (4) | 4 (5) | 4 (5) | 3 (4) | 0.018 |
| **CAT$** | 13(12) | 13 (11) | 16 (12.5) | 12 (9) | 15 (15) | 10.5 (9.5) | 0.249 |
| **CCQ$** | 1.7 (1.6) | 1.7 (1.5) | 2.1 (1.6) | 1.5 (1.3) | 2.1 (1.9) | 1.3 (1.4) | 0.046 |

**Table S1**: **Baseline characteristics of initial study population separated by centre**

BMI – body mass index; FEV1% – forced expiratory volume in 1 second percentage predicted; RV/TLC% - ratio of residual volume to total lung volume percentage predicted; 6MWD –six minute walk distance; QMVC – quadriceps maximal voluntary contraction; AG – Actigraph GT3X monitor; MM – Dynaport MiniMod monitor; mvpa – moderate to vigorous physical activity; VMU – vector magnitude units; ln – natural logarithm; °C – degrees centigrade; HAD A – Hospital Anxiety and Depression Scale – Anxiety score; HAD D – Hospital Anxiety and Depression Scale – Depression score; CAT – COPD Assessment Tool; CCQ – Clinical COPD Questionnaire. ~Male/Female represented as frequencies with result of Chi squared test presented. $Although these data are presented, there were several missing values so they were not used in further analysis
